# Supplementary figures and images for: Characterization of miRNomes in Acute and Chronic Myeloid Leukemia Cell Lines
Source: PubMed Central journal article supplement — Genomics Proteomics Bioinformatics. 2014 Apr 19;12(2):79–91. doi: 10.1016/j.gpb.2014.02.001 (PMC4411353; doi:10.1016/j.gpb.2014.02.001), 2014-04-19

A

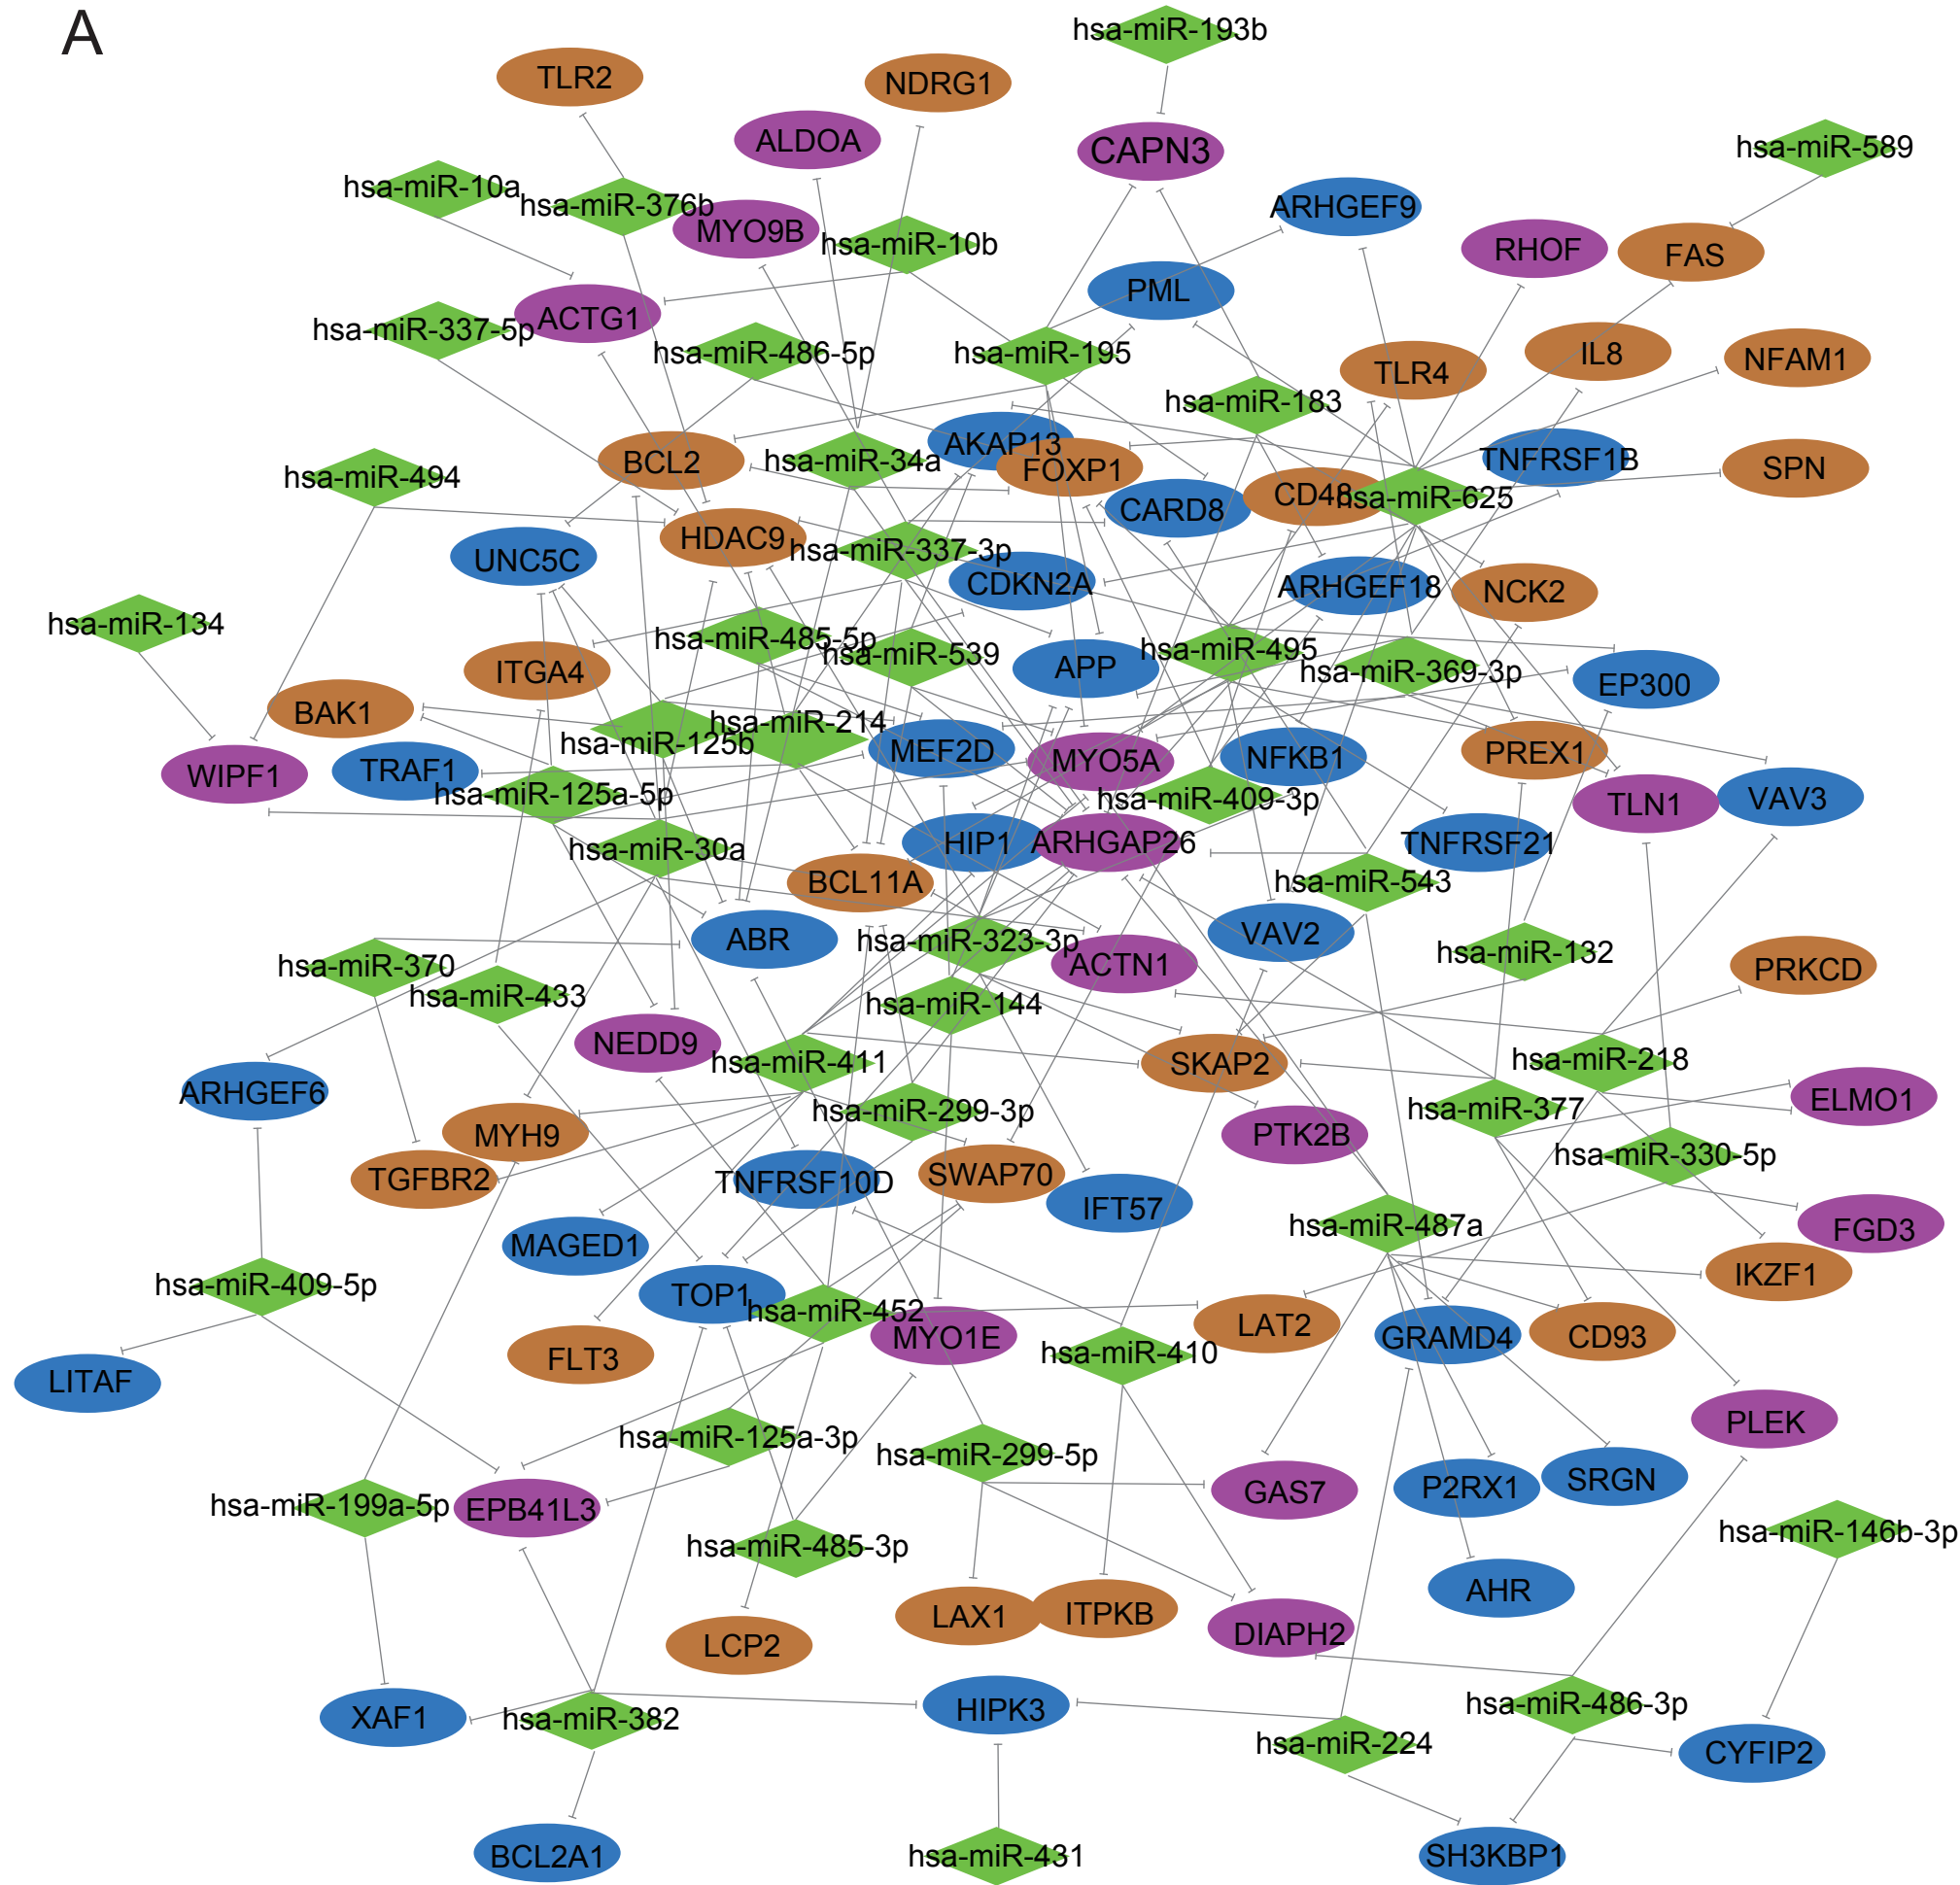

B

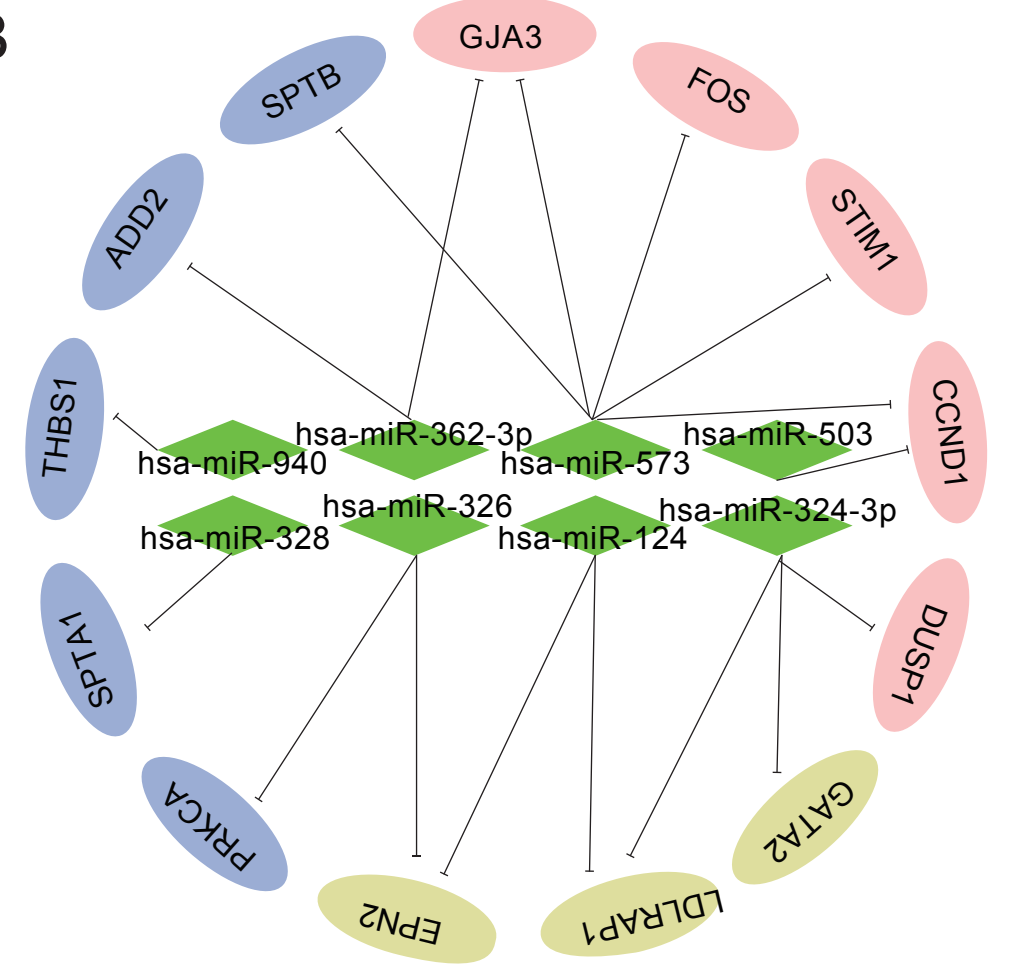

C

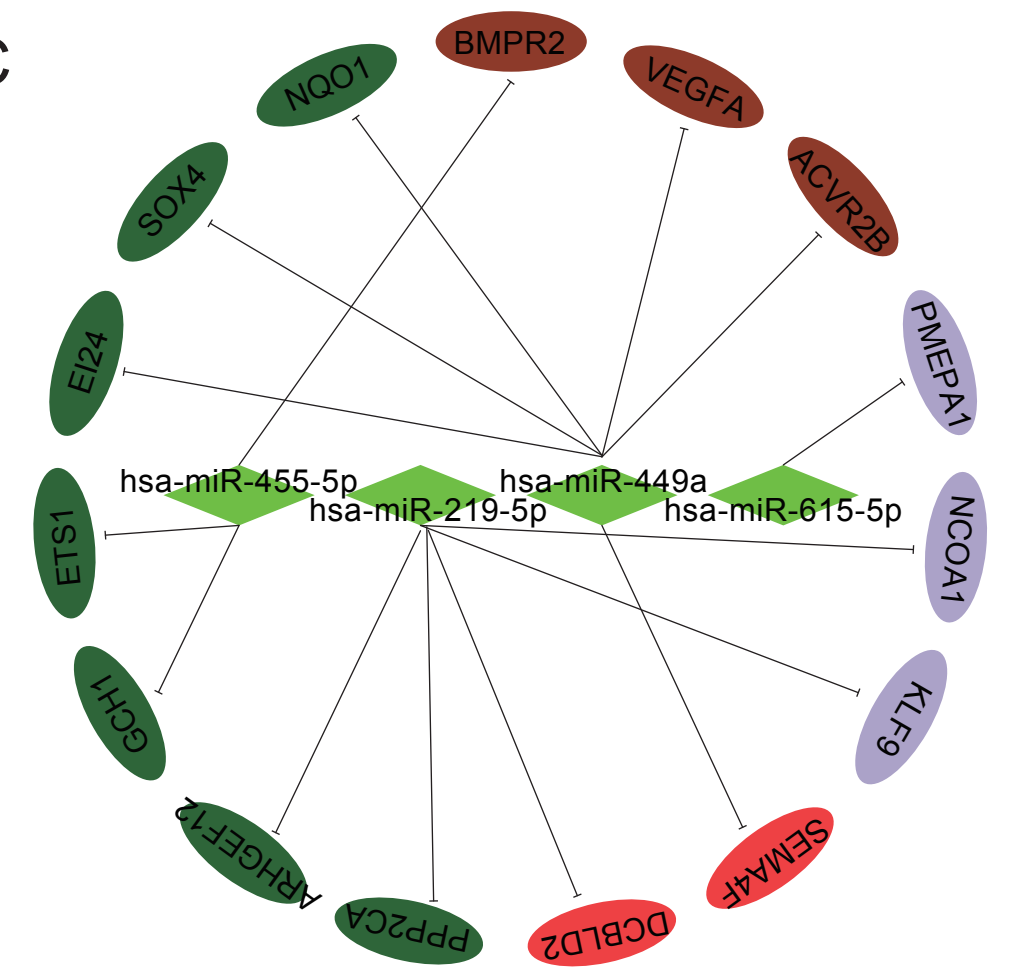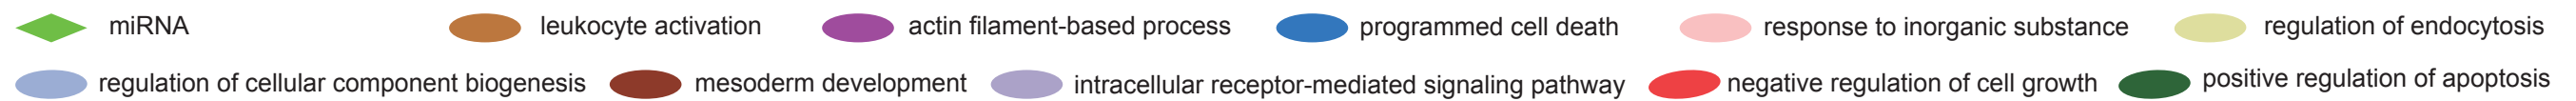

Supplement: mmc1.pdf [file mmc1.pdf]

**A ACUTE MYELOID LEUKEMIA**

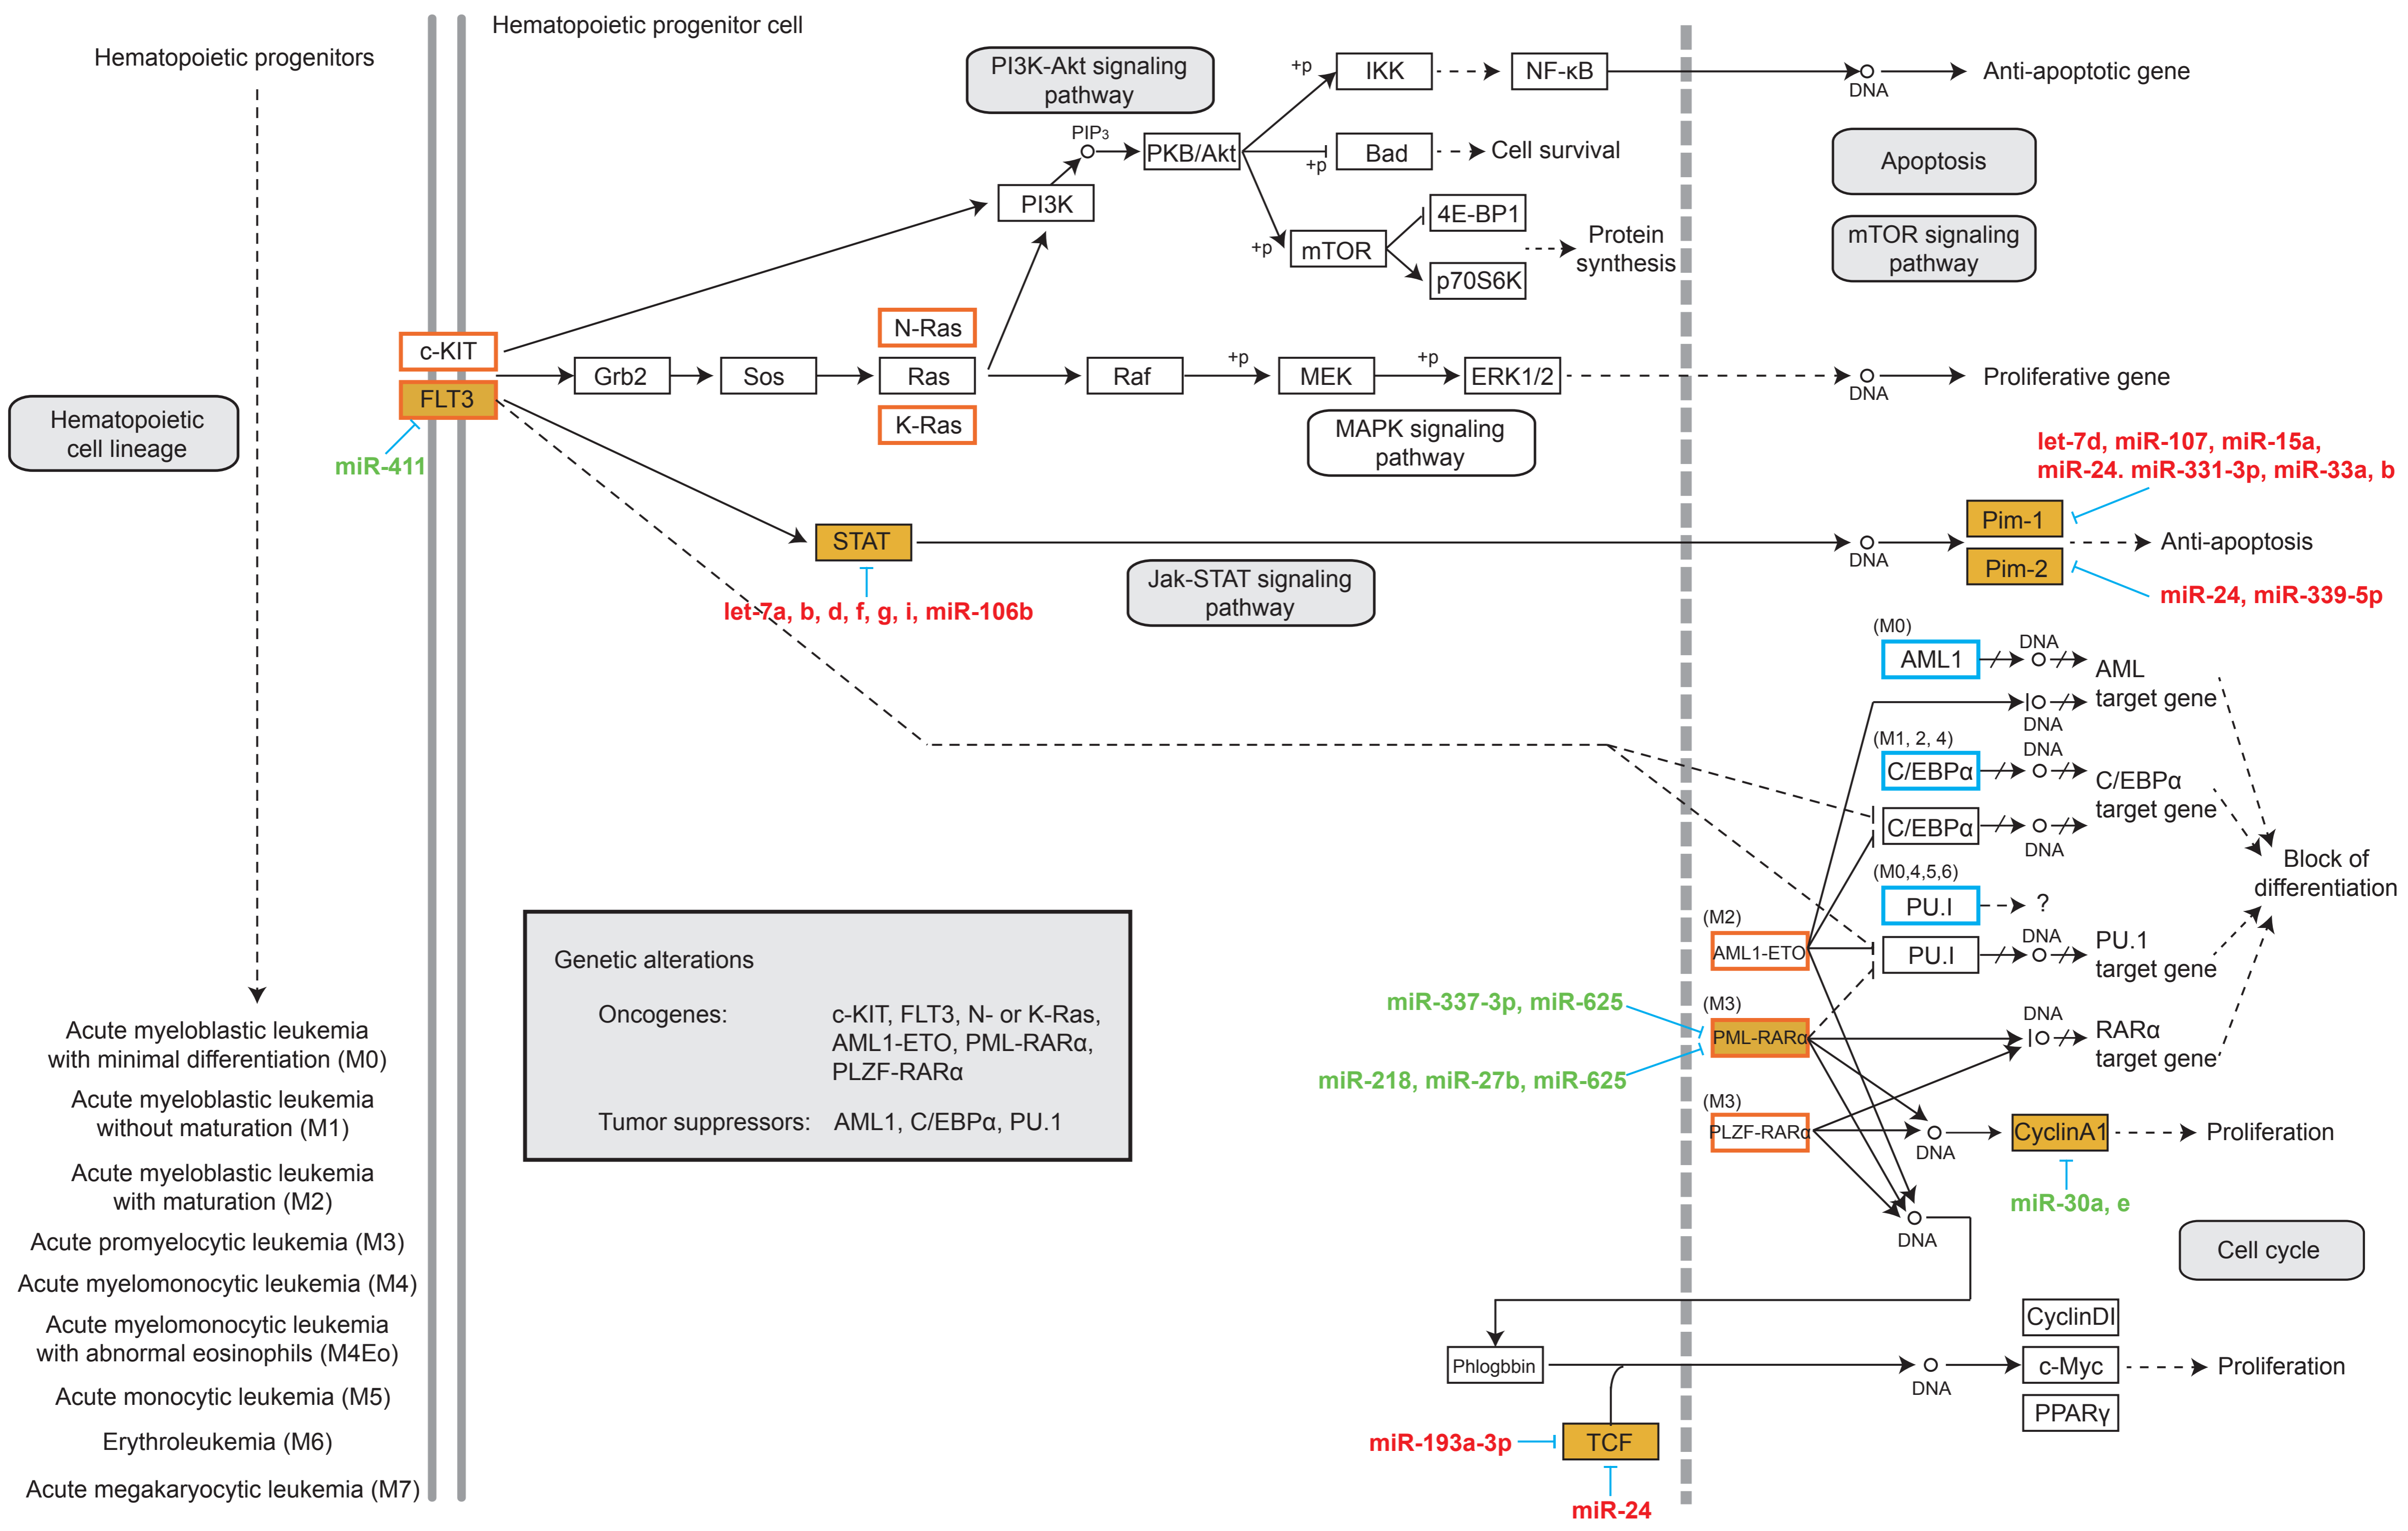

**B CHRONIC MYELOID LEUKEMIA**

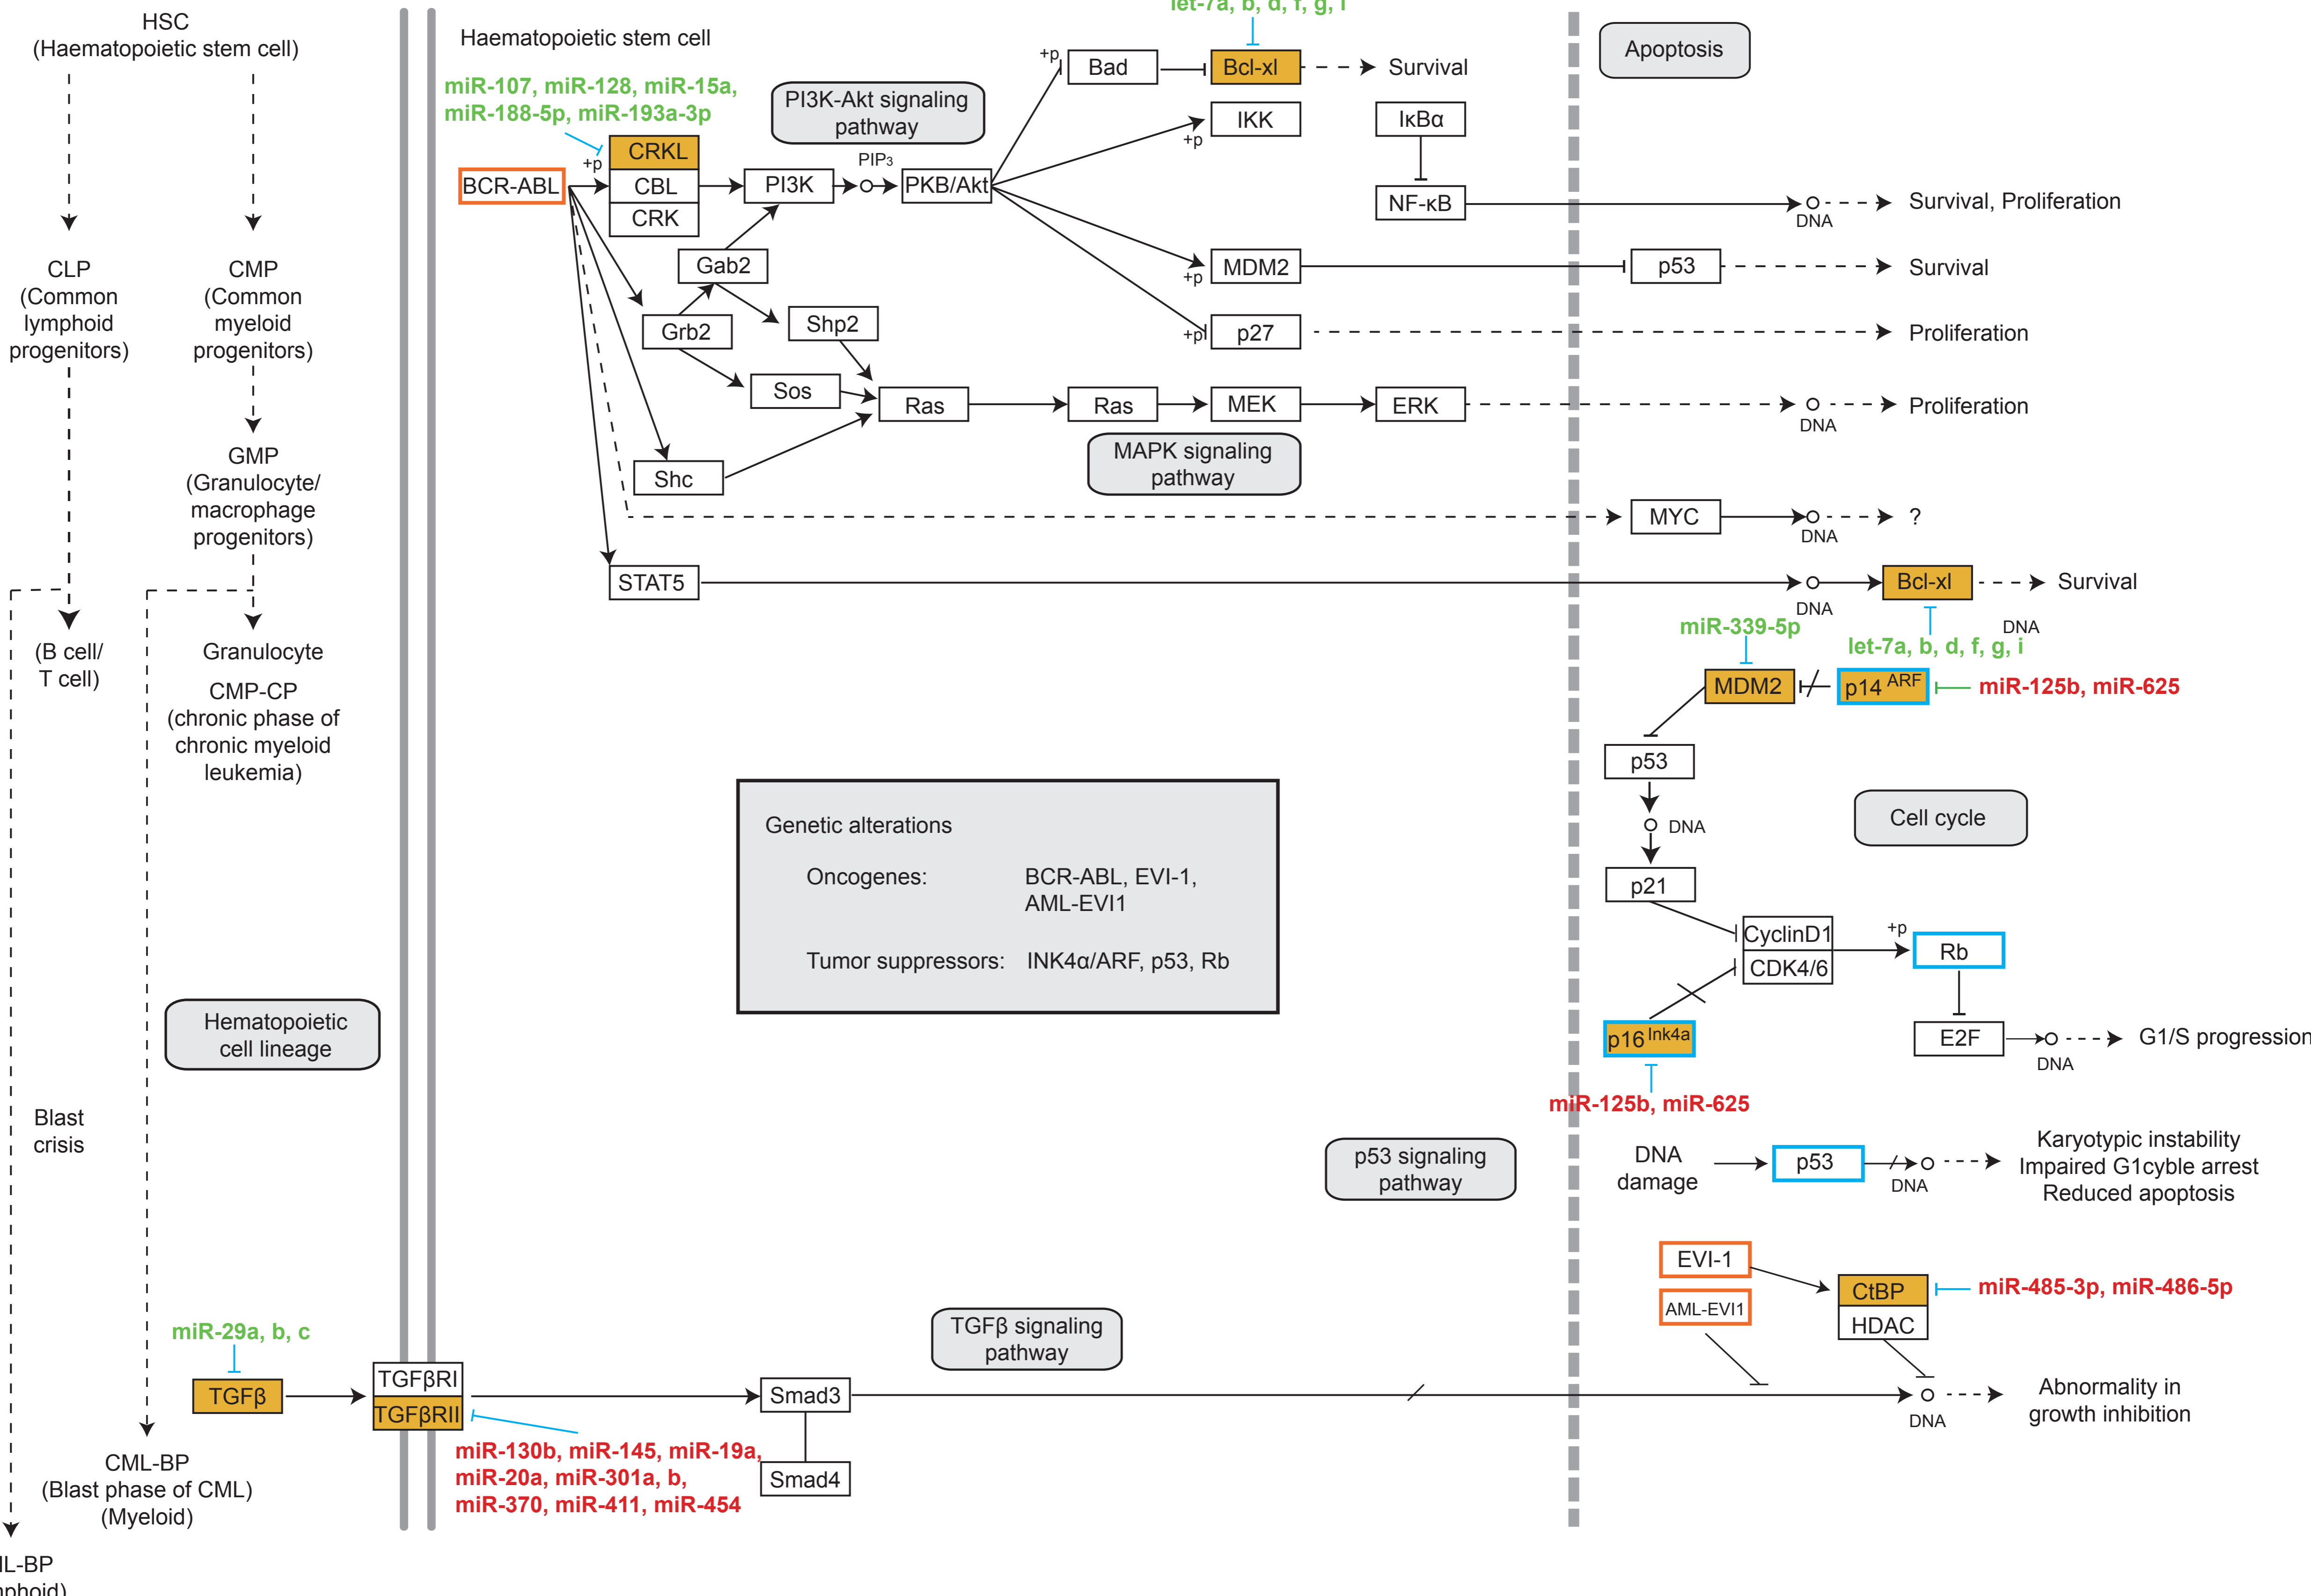

Supplement: mmc2.pdf [file mmc2.pdf]

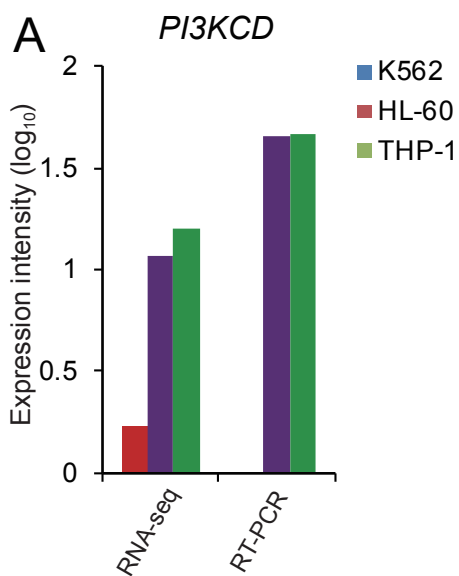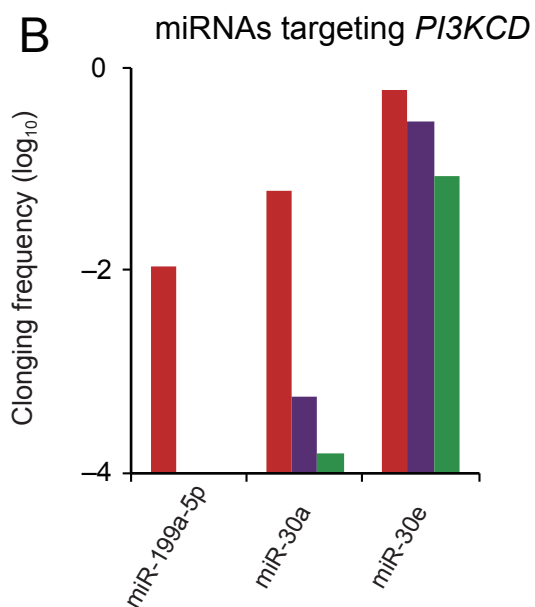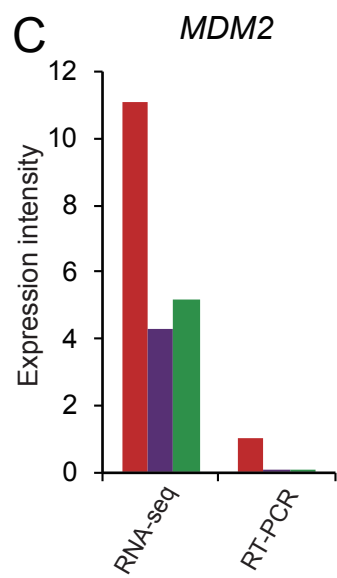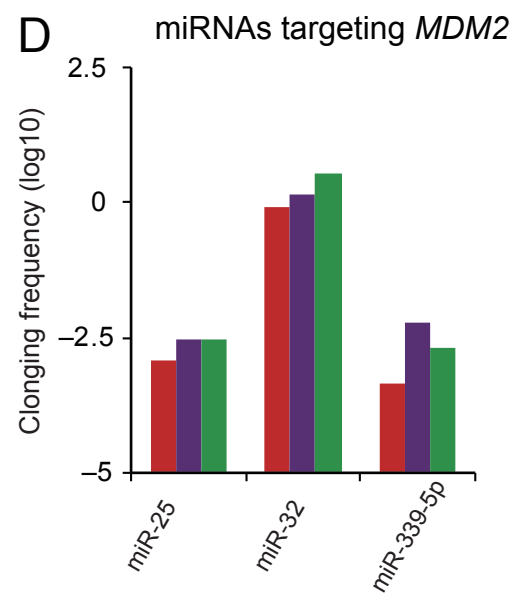

Supplement: mmc3.pdf [file mmc3.pdf]
